# Supplementary material
Source: ML conference proceedings conference paper supplement (https://proceedings.neurips.cc/paper_files/paper/2007/hash/ec8956637a99787bd197eacd77acce5e-Abstract.html)
Supplement: Supplementary file [file ec8956637a99787bd197eacd77acce5e-Supplemental.zip]

# Spatial Latent Dirichlet Allocation

Xiaogang Wang and Eric Grimson, **Poster ID: M60**

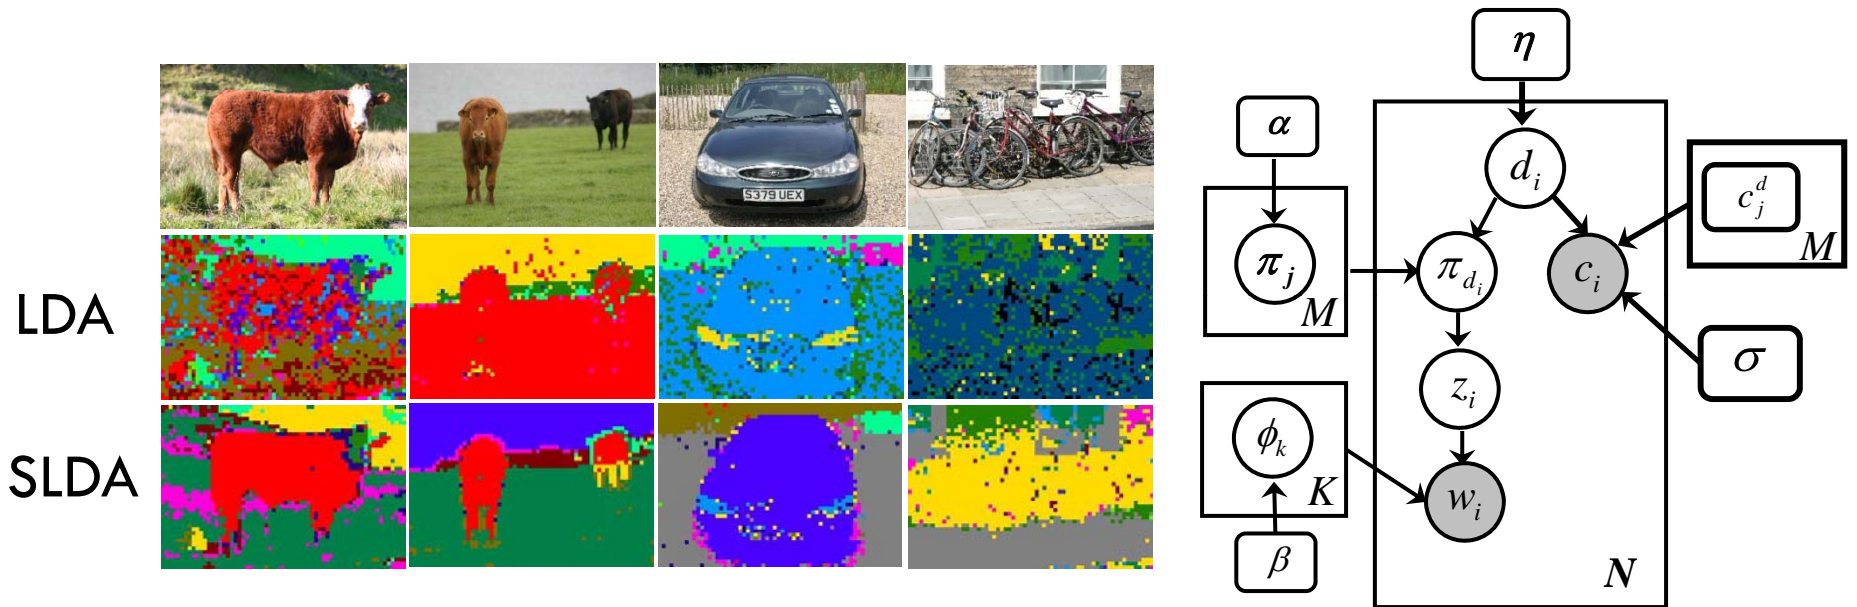

- ❑ Discover objects from collections of images and video sequences
- ❑ Add spatial structures among visual words in a topic model

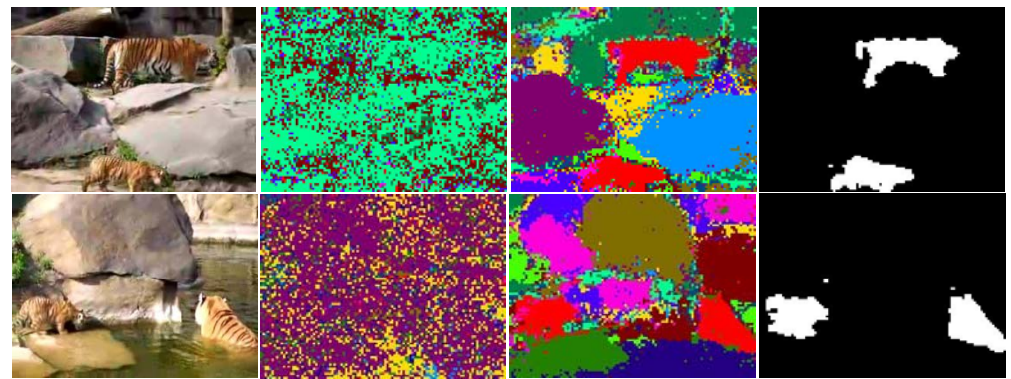

LDA

SLDA
